# Supplementary material for: Priming Strategies for Benefiting Plant Performance under Toxic Trace Metal Exposure
Source: MDPI journal article supplement (doi:10.3390/plants10040623), 2021-03-25
Supplement: s1 [file s1]

**Table 1.** Application of metals as priming agents towards secondary non-metallic stress tolerance.

| Priming metal                                                                                       | Plant material                        | Secondary stress                                                  | Effects                                                                                                                                                                                                                     | Reference |
|-----------------------------------------------------------------------------------------------------|---------------------------------------|-------------------------------------------------------------------|-----------------------------------------------------------------------------------------------------------------------------------------------------------------------------------------------------------------------------|-----------|
| Ag<br>(10–30 mM Ag nano- particles)                                                                 | <i>Pennisetum glaucum</i> seeds       | salt stress (120-150 mM NaCl)                                     | ↑ biomass<br>↑ proline content<br>↑ improved antioxidant defense,<br>↑ accumulation of phenolic compounds                                                                                                                   | [36]      |
| Ca<br>(0.3–0.5 mM Ca(OH) <sub>2</sub> , Ca(NO <sub>3</sub> ) <sub>2</sub> , and CaCl <sub>2</sub> ) | <i>Oryza sativa</i> seeds             | oxidative stress (fluoride induced)                               | ↑ seed germination<br>↑ seedling growth<br>↑ antioxidant response,<br>↑ activity and expression of antioxidant enzymes and proline and glycine betaine synthesis pathway enzymes<br>↓ reduced ROS and fluoride accumulation | [38]      |
| Cu<br>(80 μM CuSO <sub>4</sub> )                                                                    | <i>Zea mays</i> seedlings             | biotic stress (insect herbivore attack)                           | ↑ JA synthesis<br>↑ volatile organic compounds (VOCs) emission                                                                                                                                                              | [39]      |
| Cu<br>(69.4 μM nano-Cu <sup>0</sup> nanoparticles)                                                  | <i>Zea mays</i> seedlings             | drought                                                           | ↑ shoot morphology<br>↑ plant biomass and improved grain yield<br>↑ content of chlorophyll, carotenoids and anthocyanins<br>↓ ROS production                                                                                | [32]      |
| K<br>(50 mM KCl)                                                                                    | <i>Brassica oleracea</i> seeds        | salt stress                                                       | ↑ seed survival rate,<br>↑ seedling morphology,<br>↔ nutritional status and phenolic compounds profile                                                                                                                      | [30]      |
| K<br>(150–300 kg·ha <sup>-1</sup> K <sub>2</sub> O)                                                 | <i>Gossypium hirsutum</i> plants      | drought                                                           | ↑ fiber strength<br>↑ concentrations of carbohydrates (sucrose, cellulose )<br>↑ glucanase activity                                                                                                                         | [31]      |
| V<br>(VOSO <sub>4</sub> , 10 <sup>-6</sup> M oxido-vanadium(IV) complexes)                          | <i>Arabidopsis thaliana</i> seedlings | oxidative stress (100 mM H <sub>2</sub> O <sub>2</sub> treatment) | ↑ leaf morphology, plastids and cell walls protected from H <sub>2</sub> O <sub>2</sub> accumulation                                                                                                                        | [37]      |
| Zn<br>(4 mM ZnSO <sub>4</sub> )                                                                     | <i>Zea mays</i> seeds                 | salt stress (100 mM NaCl)                                         | ↑ biomass<br>↑ nutrient and micronutrient status                                                                                                                                                                            | [34]      |
| Zn<br>(4 mM ZnSO <sub>4</sub> ),<br>K<br>(23 mM K <sub>2</sub> SO <sub>4</sub> )                    | <i>Zea mays</i> seeds                 | salt stress, saline-sodic soil                                    | ↑ biomass<br>↑ elevated shoot Ca and Zn concentrations<br>↑ photosynthesis                                                                                                                                                  | [35]      |
| Zn<br>(10 mM NA <sup>1</sup> )                                                                      | <i>Zea mays</i> seeds                 | drought                                                           | ↑ germination capacity,<br>↑ activity of antioxidant enzymes<br>↑ higher Zn translocation to shoots                                                                                                                         | [33]      |

↓ decrease/reduction; ↑ increase/enhancement, ↔ no effect. <sup>1</sup> data unavailable
